# Supplementary material
Source: publisher site journal article supplement (https://www.spandidos-publications.com/4935/downloadSupplementary)
Supplement: Supplementary file 1 [file downloadSupplementary]

Table SI. Adverse events during treatment with pembrolizumab-carboplatin-paclitaxel for each individual patient.

| Patient order no. | Event type and grade            |                                                                           |                                  |     |     |
|-------------------|---------------------------------|---------------------------------------------------------------------------|----------------------------------|-----|-----|
|                   | G1                              | G2                                                                        | G3                               | G4  | G5  |
| 1                 | Peripheral neuropathy           | Asthenia, anorexia, alopecia, anemia, trombopenia, respiratory infection  | (-)                              | (-) | (-) |
| 2                 | Peripheral neuropathy           | Asthenia, anorexia, alopecia, anemia, thrombopenia, respiratory infection | (-)                              | (-) | (-) |
| 3                 | Anemia, hypomagnesemia          | Neutropenia asthenia seromucous otitis                                    | Neutropenia, Hypertensive crisis | (-) | (-) |
| 4                 | Peripheral neuropathy           | Asthenia, anorexia, alopecia                                              | Neutropenia, Thrombopenia        | (-) | (-) |
| 5                 | Peripheral neuropathy           | Asthenia, anorexia, alopecia, anemia, trombopenia, respiratory infection  | (-)                              | (-) | (-) |
| 6                 | Peripheral neuropathy           | Asthenia, anorexia, alopecia, anemia, trombopenia, respiratory infection  | (-)                              | (-) | (-) |
| 7                 | Peripheral neuropathy           | Asthenia, anorexia, alopecia                                              | (-)                              | (-) | (-) |
| 8                 | Peripheral neuropathy           | Asthenia, anorexia, alopecia                                              | (-)                              | (-) | (-) |
| 9                 | Asthenia, tumor ulcer infection | Peripheral neuropathy                                                     | (-)                              | (-) | (-) |
| 10                | Hypomagnesemia, thrombopenia    | Alopecia, asthenia, nausea, anemia, anorexia                              | Hypomagnesemia                   | (-) | (-) |

Event grading according to Common Terminology Criteria for Adverse Events version 4.1. G, grade; (-), not applicable.

Table SII. Treatment compliance during treatment with pembrolizumab-carboplatin-paclitaxel for each individual patient.

| Patient | Pembrolizumab combination |        |                |                  | Carboplatin                                                 |        |                            |                     |                |                  | Paclitaxel                                                                     |        |                            |                     |                |                  | Maintenance pembrolizumab |        |                |                  |
|---------|---------------------------|--------|----------------|------------------|-------------------------------------------------------------|--------|----------------------------|---------------------|----------------|------------------|--------------------------------------------------------------------------------|--------|----------------------------|---------------------|----------------|------------------|---------------------------|--------|----------------|------------------|
|         | Dose, mg/m <sup>2</sup>   | Cycles | Delayed cycles | Mean delay, days | Initial dose, mg/d (Mean dose received, mg/m <sup>2</sup> ) | Cycles | Cycles with dose reduction | % of dose reduction | Delayed cycles | Mean delay, days | Initial dose, mg/m <sup>2</sup> (mg/d) : Mean dose received, mg/m <sup>2</sup> | Cycles | Cycles with dose reduction | % of dose reduction | Delayed cycles | Mean delay, days | Dose, mg/m <sup>2</sup>   | Cycles | Delayed cycles | Mean delay, days |
| 1       | 200                       | 2      | 0              | 0                | AUC 2 176 (108)                                             | 2      | 1                          | 32                  | 0              | 0                | 80 (132): 80                                                                   | 2      | 1                          | 30                  | 1              | 0                | 200                       | 2      | 0              | 0                |
| 2       | 200                       | 3      | 0              | 0                | AUC 3 200 (137)                                             | 1      | 0                          | 0                   | 0              | 0                | 80 (112): 77                                                                   | 2      | 1                          | 12.5                | 0              | 0                | 200                       | 0      | 0              | 0                |
| 3       | 200                       | 11     | 1              | 7                | AUC 4 337 (200)                                             | 11     | 7                          | 23                  | 1              | 7                | 150 (184): 110                                                                 | 11     | 7                          | 33                  | 1              | 7                | 200                       | 0      | 0              | 0                |
| 4       | 200                       | 6      | 0              | 0                | AUC 4 337 (216)                                             | 6      | 2                          | 18                  | 0              | 0                | 150 (193): 124                                                                 | 6      | 2                          | 13                  | 0              | 0                | 200                       | 25     | 2              | 7                |
| 5       | 200                       | 3      | 0              | 0                | AUC 2 327 (177)                                             | 3      | 0                          | 0                   | 0              | 0                | 60 (106): 60                                                                   | 3      | 0                          | 0                   | 0              | 0                | 200                       | 0      | 0              | 0                |
| 6       | 200                       | 6      | 0              | 0                | AUC 3 300 (167)                                             | 6      | 0                          | 0                   | 0              | 0                | 90 (156): 90                                                                   | 6      | 0                          | 0                   | 0              | 0                | 200                       | 1      | 0              | 0                |

|    |     |   |   |    |                    |   |   |   |   |    |                      |   |   |   |   |    |     |   |   |   |
|----|-----|---|---|----|--------------------|---|---|---|---|----|----------------------|---|---|---|---|----|-----|---|---|---|
| 7  | 200 | 2 | 0 | 0  | AUC 3 250<br>(152) | 2 | 0 | 0 | 0 | 0  | 125<br>(202):<br>125 | 2 | 0 | 0 | 0 | 0  | 200 | 0 | 0 | 0 |
| 8  | 200 | 1 | 0 | 0  | AUC 3 400<br>(239) | 1 | 0 | 0 | 0 | 0  | 150<br>(250):<br>150 | 1 | 0 | 0 | 0 | 0  | 200 | 0 | 0 | 0 |
| 9  | 200 | 6 | 2 | 14 | AUC 4 552<br>(302) | 6 | 0 | 0 | 2 | 14 | 150<br>(240):<br>150 | 6 | 0 | 0 | 2 | 14 | 200 | 1 | 0 | 0 |
| 10 | 200 | 6 | 1 | 7  | AUC 4 300<br>(212) | 6 | 0 | 0 | 1 | 7  | 150<br>(150):<br>150 | 6 | 0 | 0 | 1 | 7  | 200 | 1 | 0 | 0 |

AUC, area under the concentration curve; CBDCA, carboplatin.

Table SIII. Association and correlation between programmed death-ligand 1 expression and efficacy of pembrolizumab-carboplatin-paclitaxel.

| A, Pembro + CP (n=10)   |                          |         |                          |          |
|-------------------------|--------------------------|---------|--------------------------|----------|
| Variable                | Association <sup>a</sup> |         | Correlation <sup>b</sup> |          |
|                         | TPS                      | CPS     | TPS                      | CPS      |
| ORR                     | P=0.397                  | P=0.886 | (-)                      | (-)      |
| PFS                     | P=1.000                  | P=1.000 | r=0.062                  | τ=0.203  |
| OS                      | P=1.000                  | P=1.000 | r= -0.037                | τ=-0.073 |
| B, Pembro + 3wkCP (n=8) |                          |         |                          |          |
| Variable                | Association <sup>a</sup> |         | Correlation <sup>b</sup> |          |
|                         | TPS                      | CPS     | TPS                      | CPS      |
| ORR                     | P=1.000                  | P=1.000 | (-)                      | (-)      |
| PFS                     | P=1.000                  | P=1.000 | r=0.345                  | τ=0.431  |
| OS                      | P=1.000                  | P=1.000 | r=0.265                  | τ=0.077  |

<sup>a</sup>Fisher's exact test was used to evaluate any association between PDL1 expression and response and survival in the whole population (n=10) and in patients treated with pembro + 3wkCP (n=8). <sup>b</sup>Pearson's Correlation Test was used to evaluate any correlations between the TPS and survival and Kendall's Correlation Test was used to evaluate any correlation between the CPS and survival. (-), not applicable; 3wkCP, 3-weekly carboplatin-paclitaxel; CPS, combined positive score; ORR, overall response rate; OS, overall survival; pembro + CP, pembrolizumab-carboplatin-paclitaxel; pembro, pembrolizumab; PFS, progression-free survival; TPS, tumor proportion score.
